# Supplementary material for: Computational predictions turning the isomers of alanine to generate distinct morphs of free-flowing salt crystals
Source: Royal Society of Chemistry journal article supplement (doi:10.1039/c8cp01697f), 2018-01-01
Supplement: c8cp01697f2.pdf [file c8cp01697f2.pdf]

## Electronic Supplementary Information

### Computational predictions turning the isomers of alanine to generate distinct morphs of free flowing salt crystals

Mrinal Kanti Si, Sumit Kumar Pramanik, Vinayak Hingu, and Bishwajit Ganguly \*

*M. K. Si, Dr. S.K. Pramanik, V. Hingu and Dr. B. Ganguly. Analytical Discipline & Centralized Instrument Facility; Central Salt and Marine Chemicals Research Institute G.B. Marg, Bhavnagar, Gujarat-364002 (India)*

*E-mail: [gang\\_12@rediffmail.com](mailto:gang_12@rediffmail.com)*

| Serial No. |                                                                                                                                                                                                                                             | Page No. |
|------------|---------------------------------------------------------------------------------------------------------------------------------------------------------------------------------------------------------------------------------------------|----------|
| 1          | Complete Gaussian reference.                                                                                                                                                                                                                | 2        |
| 2          | <b>Figure S1.</b> The powder- XRD patterns of the homogeneous NaCl crystals obtained from pure saturated NaCl solution.                                                                                                                     | 2        |
| 3          | <b>Figure S2.</b> The powder- XRD patterns of the homogeneous NaCl crystals obtained from 30% (w/v) $\alpha$ -alanine contaminated saturated NaCl solution.                                                                                 | 3        |
| 4          | <b>Figure S3.</b> The powder- XRD patterns of the homogeneous NaCl crystals obtained from 30% (w/v) $\beta$ -alanine contaminated saturated NaCl solution.                                                                                  | 3        |
| 5          | <b>Figure S4.</b> ESI-MS spectrum of $\alpha$ -alanine.                                                                                                                                                                                     | 4        |
| 6          | <b>Figure S5.</b> ESI-MS spectrum of $\beta$ -alanine.                                                                                                                                                                                      | 4        |
| 7          | <b>Figure S6.</b> HPLC (High-performance liquid chromatography) Curve of $\alpha$ -alanine.                                                                                                                                                 | 5        |
| 8          | <b>Figure S7.</b> HPLC (High-performance liquid chromatography) Curve of $\beta$ -alanine.                                                                                                                                                  | 5        |
| 9          | <b>Figure S8.</b> DSC Curve of $\alpha$ -alanine showing the melting point measurements.                                                                                                                                                    | 6        |
| 10         | <b>Figure S9.</b> DSC Curve of $\beta$ -alanine showing the melting point measurements.                                                                                                                                                     | 6        |
| 11         | <b>Table TS1.</b> CHN analysis of $\alpha$ -alanine.                                                                                                                                                                                        | 7        |
| 12         | <b>Table TS2.</b> CHN analysis of $\beta$ -alanine.                                                                                                                                                                                         | 7        |
| 13         | <b>Figure S10.</b> BSSE corrected energies (kcal/mol) Calculated at the M06-2X/6-31+G(d) level for $\beta$ -alanine with {100}, {110}, and {111} Surfaces of NaCl derived from slab model. (The interaction energies are given in bracket). | 7        |

## Complete Gaussian reference

M. J. Frisch, G. W. Trucks, H. B. Schlegel, G. E. Scuseria, M. A. Robb, J. R. Cheeseman, G. Scalmani, V. Barone, B. Mennucci, G. A. Petersson, H. Nakatsuji, M. Caricato, X. Li, H. P. Hratchian, A. F. Izmaylov, J. Bloino, G. Zheng, J. L. Sonnenberg, M. Hada, M. Ehara, K. Toyota, R. Fukuda, J. Hasegawa, M. Ishida, T. Nakajima, Y. Honda, O. Kitao, H. Nakai, T. Vreven, J. A. Montgomery Jr, J. E. Peralta, F. Ogliaro, M. Bearpark, J. J. Heyd, E. Brothers, K. N. Kudin, V. N. Staroverov, T. Keith, R. Kobayashi, J. Normand, K. Raghavachari, A. Rendell, J. C. Burant, S. S. Iyengar, J. Tomasi, M. Cossi, N. Rega, J. M. Millam, M. Klene, J. E. Knox, J. B. Cross, V. Bakken, C. Adamo, J. Jaramillo, R. Gomperts, R. E. Stratmann, O. Yazyev, A. J. Austin, R. Cammi, C. Pomelli, J. W. Ochterski, R. L. Martin, K. Morokuma, V. G. Zakrzewski, G. A. Voth, P. Salvador, J. J. Dannenberg, S. Dapprich, A. D. Daniels, O. Farkas, J. B. Foresman, J. V. Ortiz, J. Cioslowski and D. J. Fox, Gaussian 09, Revision B01, Gaussian, Inc., Wallingford, CT, 2010.

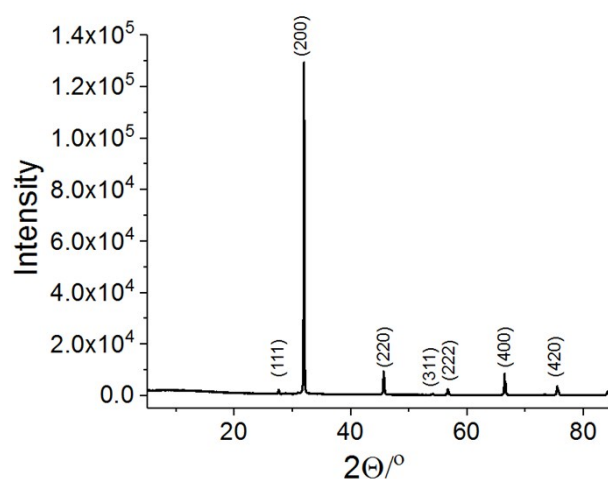

**Figure S1** The powder- XRD patterns of the homogeneous NaCl crystals obtained from pure saturated NaCl solution.

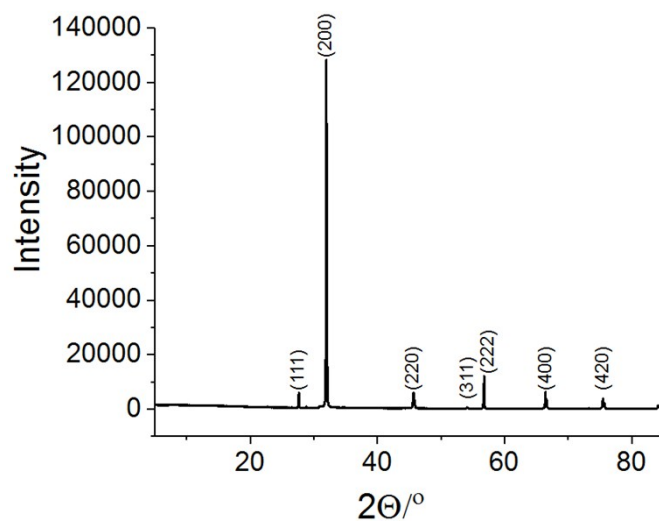

**Figure S2** The powder- XRD patterns of the homogeneous NaCl crystals obtained from 30% (w/v)  $\alpha$ -alanine contaminated saturated NaCl solution.

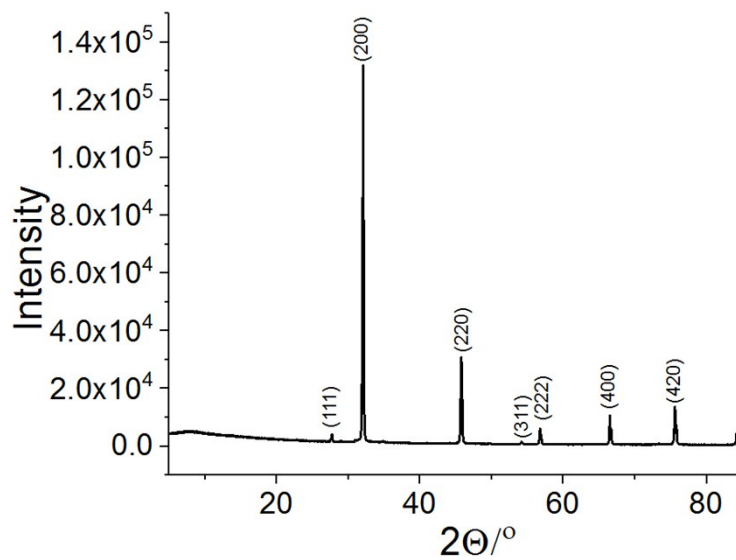

**Figure S3** The powder- XRD patterns of the homogeneous NaCl crystals obtained from 30% (w/v)  $\beta$ -alanine contaminated saturated NaCl solution.

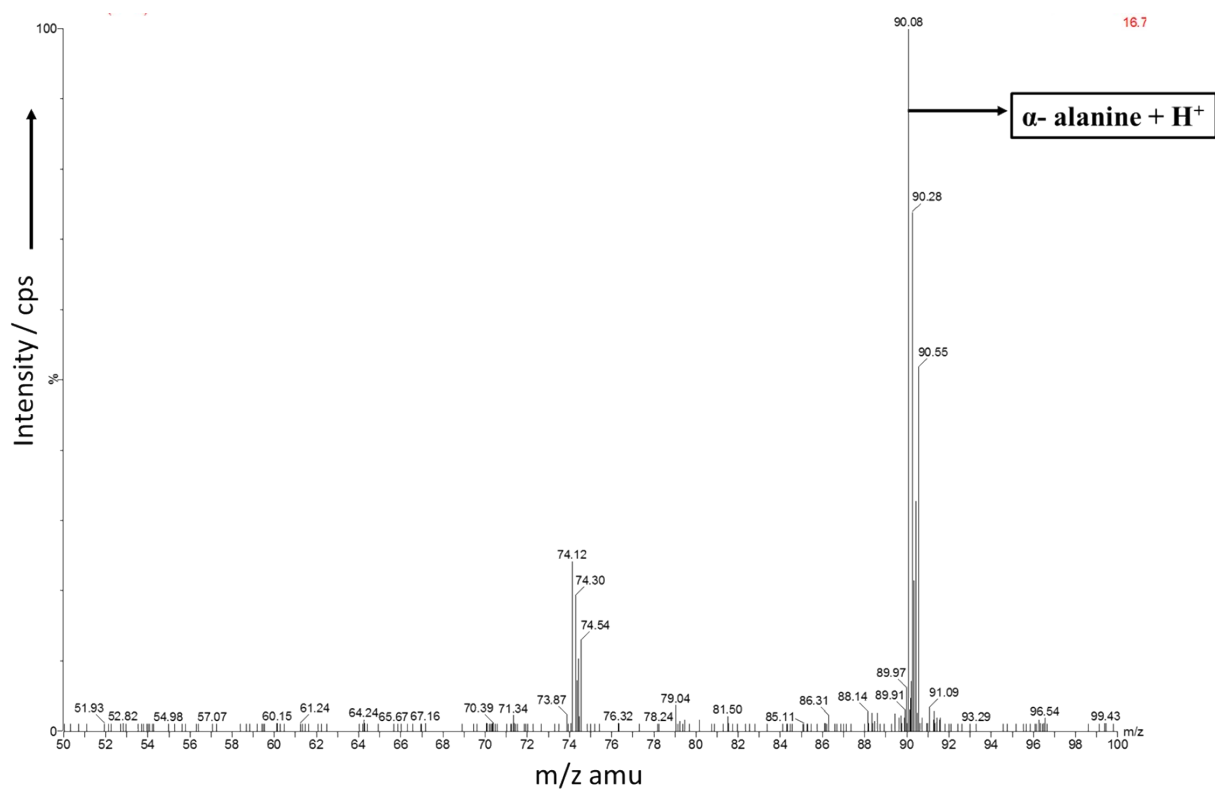

Figure S4 ESI-MS spectrum of  $\alpha$ -alanine.

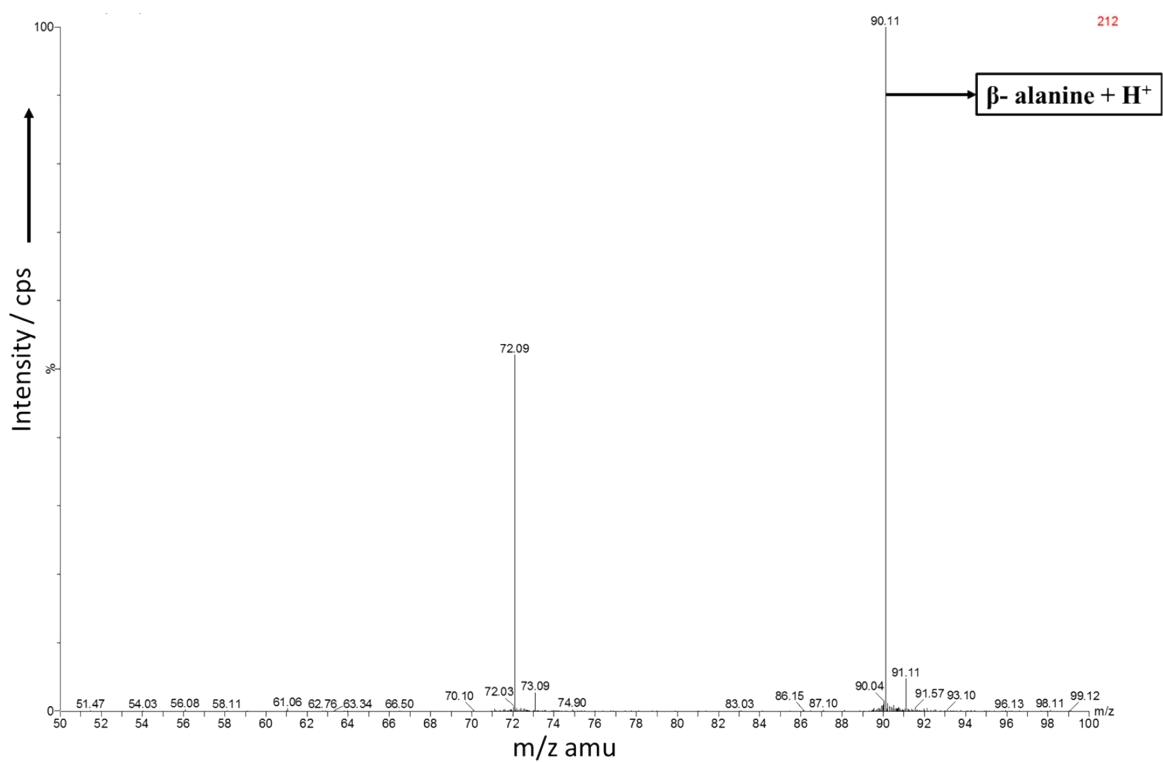

Figure S5 ESI-MS spectrum of  $\beta$ -alanine.

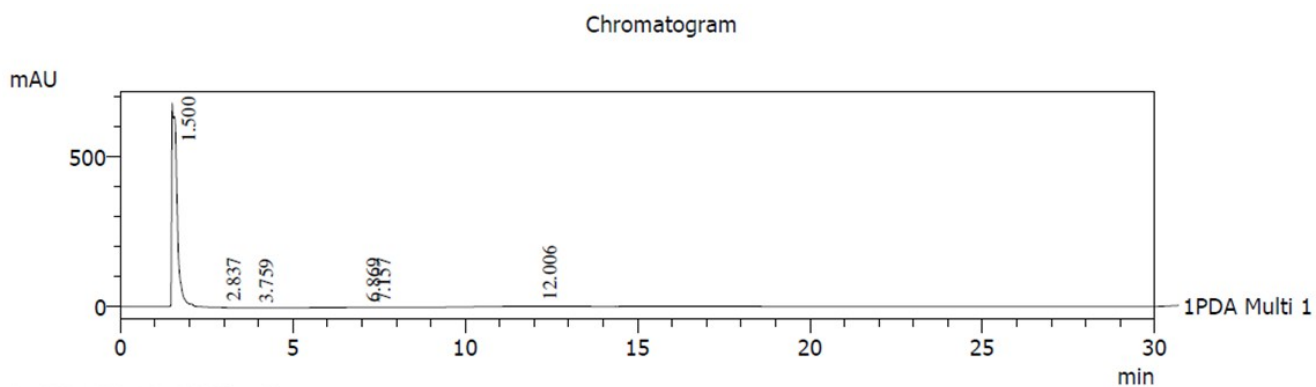

PeakTable

PDA Ch1 205nm 5nm

| Peak# | Ret. Time | Area    | Area %  |
|-------|-----------|---------|---------|
| 1     | 1.500     | 7354194 | 99.636  |
| 2     | 2.837     | 7379    | 0.100   |
| 3     | 3.759     | 1509    | 0.020   |
| 4     | 6.869     | 15467   | 0.210   |
| 5     | 7.157     | 1035    | 0.014   |
| 6     | 12.006    | 1486    | 0.020   |
| Total |           | 7381071 | 100.000 |

**Figure S6** HPLC (High-performance liquid chromatography) Curve of  $\alpha$ -alanine.

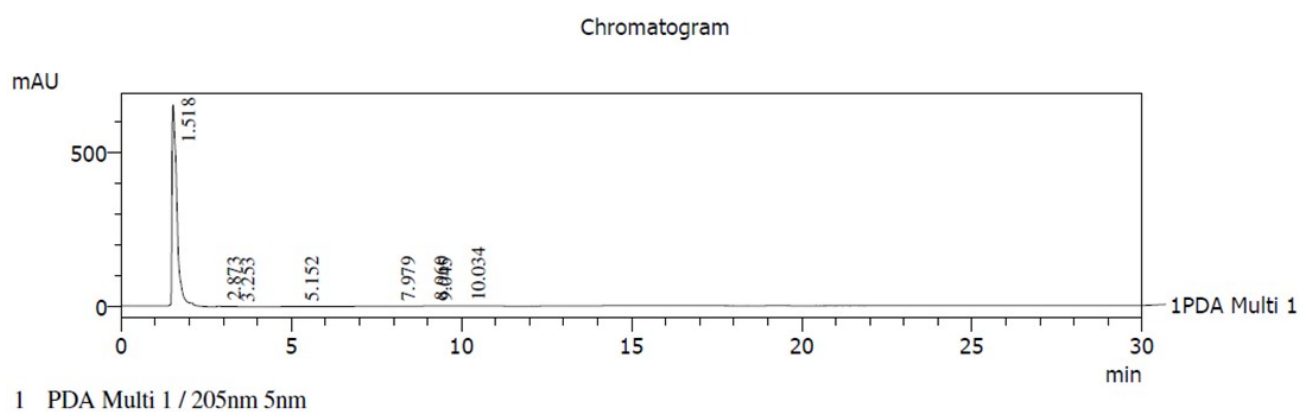

PeakTable

PDA Ch1 205nm 5nm

| Peak# | Ret. Time | Area    | Area %  |
|-------|-----------|---------|---------|
| 1     | 1.518     | 6621177 | 98.833  |
| 2     | 2.873     | 24624   | 0.368   |
| 3     | 3.253     | 37408   | 0.558   |
| 4     | 5.152     | 10649   | 0.159   |
| 5     | 7.979     | 1486    | 0.022   |
| 6     | 8.960     | 1052    | 0.016   |
| 7     | 9.045     | 1012    | 0.015   |
| 8     | 10.034    | 1944    | 0.029   |
| Total |           | 6699351 | 100.000 |

**Figure S7** HPLC (High-performance liquid chromatography) Curve of  $\beta$ -alanine.

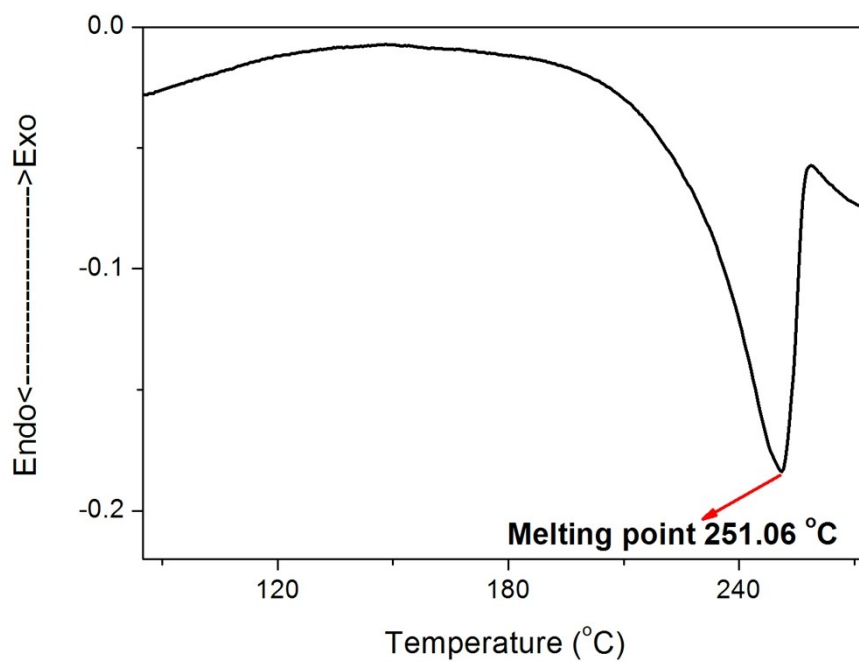

**Figure S8** DSC Curve of  $\alpha$ -alanine showing the melting point measurements.

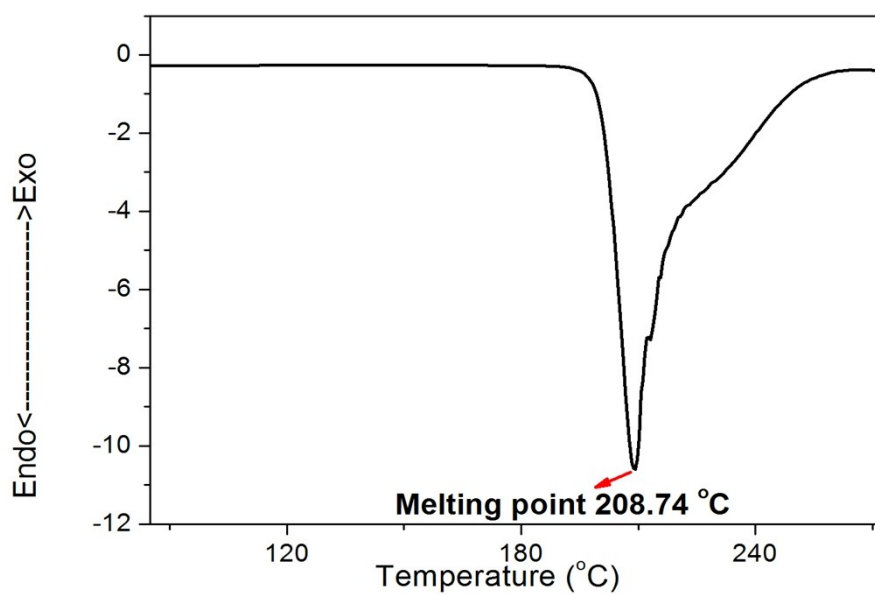

**Figure S9** DSC Curve of  $\beta$ -alanine showing the melting point measurements.

**Table TS1.** CHN analysis of  $\alpha$ -alanine.

|                                                  | C      | H     | N      |
|--------------------------------------------------|--------|-------|--------|
| Chem Biodraw analysis data for $\alpha$ -alanine | 40.44% | 7.92% | 15.72% |
| Experimental analysis data for $\alpha$ -alanine | 40.45% | 7.90% | 15.66% |

**Table TS2.** CHN analysis of  $\beta$ -alanine.

|                                                 | C      | H     | N      |
|-------------------------------------------------|--------|-------|--------|
| Chem Biodraw analysis data for $\beta$ -alanine | 40.44% | 7.92% | 15.72% |
| Experimental analysis data for $\beta$ -alanine | 40.46% | 7.79% | 15.68% |

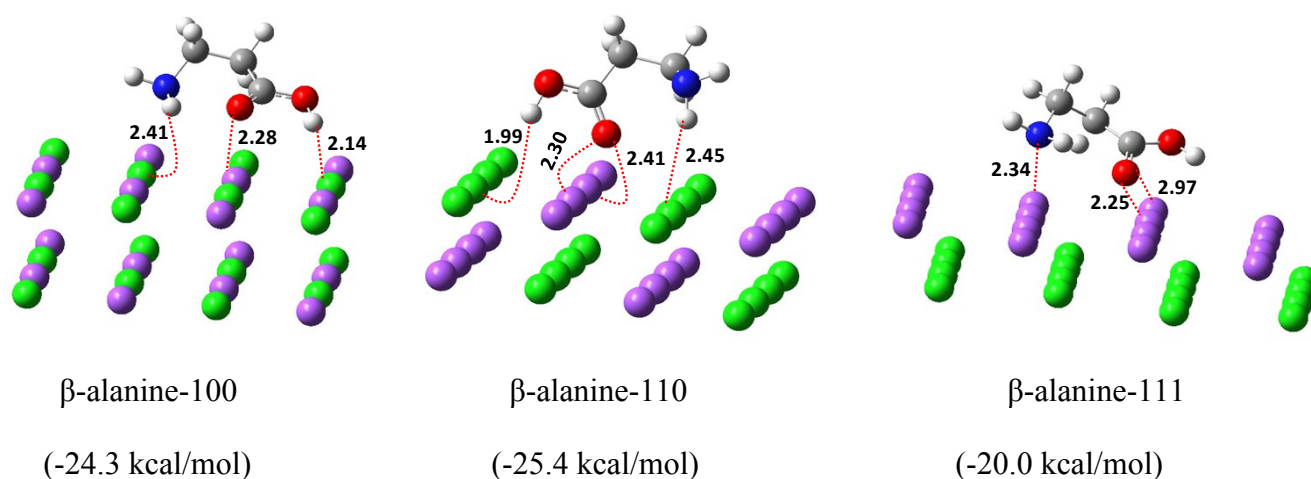**Figure S10** BSSE corrected energies (kcal/mol) Calculated at the M06-2X/6-31+G(d) level for  $\beta$ -alanine with {100}, {110}, and {111} Surfaces of NaCl derived from slab model. (The interaction energies are given in bracket).
